# Supplementary material
Source: publisher figshare collection journal article supplement (https://gsajournals.figshare.com/articles/dataset/_/9973646)
Supplement: Supplementary file 1 [file 1]

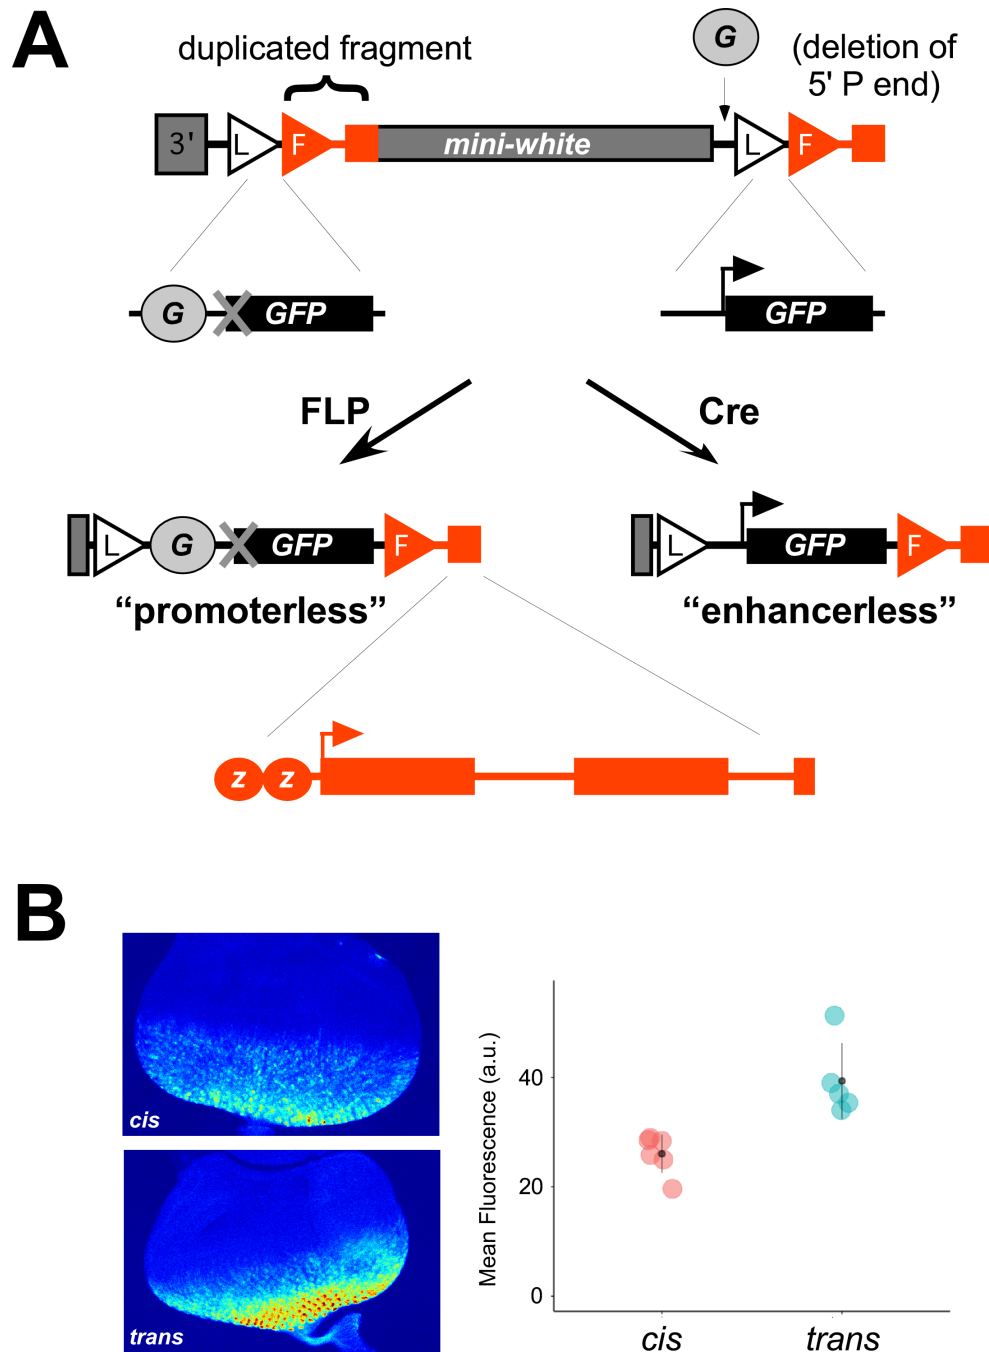

**Supplemental Figure 2. Altered P-element structure for insert at position 96C.** **A**, PCR and sequencing were used to determine that the 5' P end of this insert was deleted, and in its place was a duplicated fragment of the *mini-white* promoter region and first two exons. Zeste binding sites are indicated with "z" (Benson and Pirrotta 1988). **B**, quantitative imaging of GFP fluorescence for *GMR* action in *cis* and in *trans* at position 96C in a loss of function *z<sup>a</sup>* background shows no evidence that higher-than-expected levels of GFP expression via transvection result from Zeste activity. Scoring of fluorescence was carried out as described in the main text. Six discs were scored for each genotype.
