# Supplementary material
Source: publisher figshare collection journal article supplement (https://gsajournals.figshare.com/articles/dataset/_/9973646)
Supplement: Supplementary file 2 [file 1]

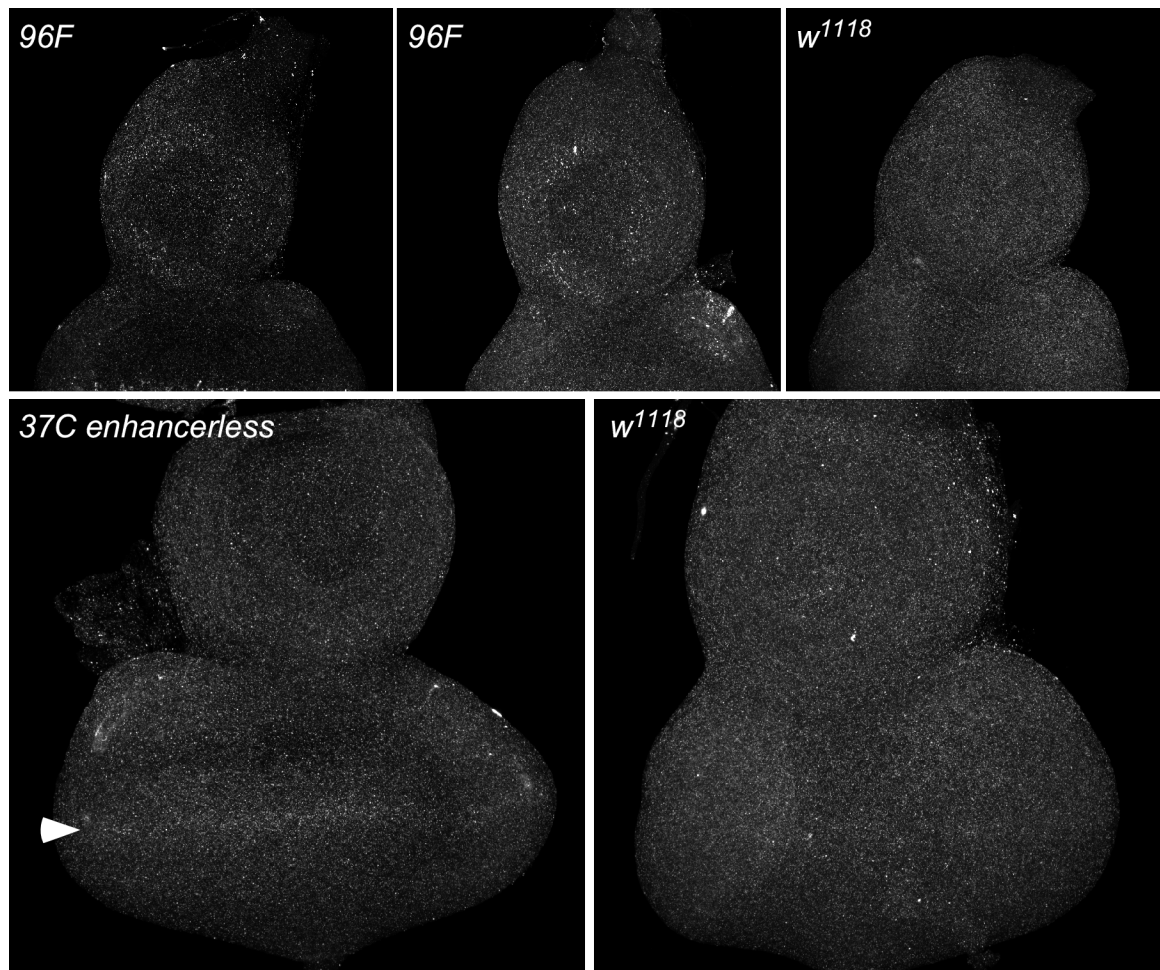

**Supplemental Figure 3. Ectopic expression of GFP mRNA for insertions 96F and 37C.** Top, *in situ* hybridization using probes specific to *GFP* mRNA on discs carrying the full insertion at position 96F show three patches of staining above background in the antenual region. Bottom, the same probe used on discs carrying the enhancerless derivative at position 37C shows a stripe of expression just anterior to the morphogenetic furrow. Discs from  $w^{1118}$  flies, with no *GFP* insertions, are shown as controls.
