# Supplementary material
Source: publisher figshare collection journal article supplement (https://gsajournals.figshare.com/articles/dataset/_/9973646)
Supplement: Supplementary file 3 [file 1]

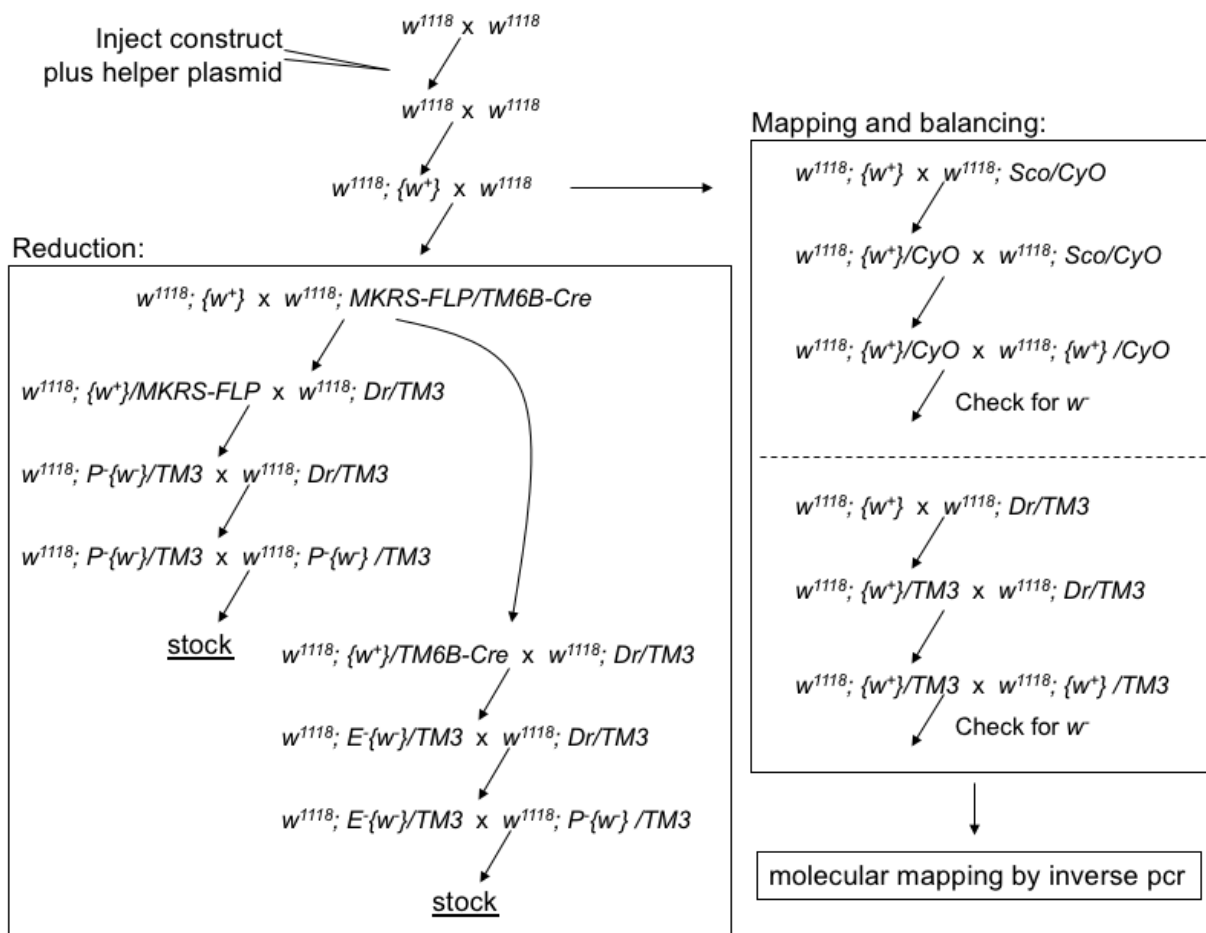

**Supplemental Figure 1.** Schematic for generating insertions and derivatives. Top, standard P-element transgenesis. “Mapping and balancing”, segregation analysis to determine autosomal insertion. “Reduction”, creation of enhancerless and promoterless derivatives (shown for a third chromosome insertion).
